# Supplementary material for: Reliability-Oriented Evaluation of Explanation Signals under Real and Synthetic Stress Tests
Source: Research Square preprint supplement (doi:10.21203/rs.3.rs-8554983/v1), 2026-01-16
Supplement: Supplementary file 1 [file b78f0753c81caf3b12ebf5e8.docx]

**Supplementary Information for: Reliability-Oriented Evaluation of Explanation Signals under Real and Synthetic Stress Tests**

MOHAMMED ALSHANTI

Faculty of Computer Studies, Arab Open University, Saudi Arabia

mshanty@arabou.edu.sa

# Supplementary Notes and Tables

Large tables are placed here to keep the main narrative compact and avoid disrupting the flow.

Note: rESS is computed as rESS = 1/(1+E), where E is the relative deviation score used in the sensitivity procedure.

Justification for Table A5 (harder variants): we report two proxy-strength levels (mild vs. strong cancellation) to emulate progressively harder spurious regimes where a proxy is exploitable mainly through feature interactions and under injected nuisance noise. This staged design avoids a single hand-picked failure case and demonstrates that agreement and AUC degrade gradually as interaction-dominance increases. [17]

Algorithm 1. Reliability evaluation protocol (pseudo-code).

Input: dataset D; model families M={LR, RF}; explainer E (global, model-specific); runs T (resampling) or seeds N (fixed split auditing); top-k (k=5); stress operator P(·); quantile q.
1: For each model m in M and each run t=1…T: draw stratified split; train f_{m,t}; compute explanation e_{m,t}=E(f_{m,t}, D_test).
2: Stability S_m ← avg_t Spearman(rank(e_{m,t}), rank(e_{m,1})).
3: Sensitivity: apply stress P to obtain D_test^P; compute ê_{m,t}; E_t ← ||e_{m,t}−ê_{m,t}||₁/(||e_{m,t}||₁+ε); rESS_t ← 1/(1+E_t).
4: Consistency C ← Jaccard(TopK(e_{LR,1}), TopK(e_{RF,1})).
5: Calibrate (τS, τE, τC) from empirical quantiles of S, rESS@Top-k, and C under regime q.
6: Reliability gate: accept iff (S≥τS) ∧ (rESS@Top-k≥τE) ∧ (C≥τC); report audit error vs coverage.

Appendix B

Audit split sanity check (Split-B).
To reduce the risk that the gated audit-error result is an artifact of a single fixed split, we include a second auditing configuration that uses an alternative fixed stratified split (Split-B) while keeping the auditing design unchanged (n=40 runs; 20 seeds × 2 model families; proxy-strength variability; the same Moderate thresholds from Table 3). On Split-B, baseline audit error remained 45.0% (18/40; 95% Wilson CI [30.7, 60.2]), and the gate reduced it to 0.0% (0/7 retained; 95% Wilson CI [0.0, 35.4]) at 17.5% coverage. We do not report Split-B AUC separately to avoid over-interpreting a single additional split; AUC context is provided by Table 2 (and its CI) under the auditing protocol.

Note: Confidence intervals in Appendix B use the Wilson score interval over runs. For gated results, the interval is computed over retained runs (n_kept) due to reduced coverage under the gate; n_kept is reported in Table B1 for Split-C and implied by coverage for Split-B (17.5% of n=40 ⇒ n_kept=7).

Appendix B sanity check (numeric, Split-C): We repeat the Wine-UCI auditing protocol on an independent fixed split (random_state=202) to verify that non-zero baseline audit error is not an artifact of a single split. Baseline audit error is 35.0% (95% Wilson CI [22.1, 50.5]). Under the same gate thresholds as in Table 2, gated audit error becomes 6.7% (95% Wilson CI [1.2, 29.8]) at 37.5% coverage (retained runs n=15). Gated CIs are computed over retained runs.

**Supplementary Table S1 | Datasets used in the main experiments.**

| **Dataset** | **Type** | **Source** | **Samples** | **Features** | **Positive_Ratio** | **Controlled_Factors** | **Role** | **seed** |
| --- | --- | --- | --- | --- | --- | --- | --- | --- |
| BreastCancer-UCI | Real (public) | UCI (via scikit-learn) | 569 | 30 | 0.627417 | — | Realistic benchmark | 42 |
| Wine-UCI | Real (public; binarized) | UCI (via scikit-learn) | 178 | 13 | 0.331461 | — | Realistic benchmark (complementary) | 42 |
| Syn-Base | Synthetic | This study | 2500 | 18 | 0.5 | imbalance_ratio=0.5, label_noise=0.0 | Controlled baseline | 42 |
| Syn-SpuriousShift-Easy | Synthetic | This study | 2500 | 19 | 0.5 | spurious correlation (train) + targeted flip in perturbation | Stress test: spurious correlation | 45 |

**Supplementary Table S2 | Stability metrics across models and datasets.**

| **Dataset** | **Model** | **XAI_Method** | **Rank_Stability_rho** | **Variance** | **AUC_mean** | **AUC_std** |
| --- | --- | --- | --- | --- | --- | --- |
| BreastCancer-UCI | LR | Model-specific global importance | 0.826696 | 0.00290499 | 0.994422 | 0.00340968 |
| BreastCancer-UCI | RF | Model-specific global importance | 0.924805 | 0.000686285 | 0.993969 | 0.00523913 |
| Syn-Base | LR | Model-specific global importance | 0.801238 | 0.00565225 | 0.923568 | 0.00826548 |
| Syn-Base | RF | Model-specific global importance | 0.686275 | 0.0121624 | 0.894937 | 0.0154932 |
| Syn-SpuriousShift-Easy | LR | Model-specific global importance | 0.784386 | 0.00726405 | 0.95879 | 0.00823541 |
| Syn-SpuriousShift-Easy | RF | Model-specific global importance | 0.835614 | 0.00453496 | 0.946066 | 0.0119289 |
| Wine-UCI | LR | Model-specific global importance | 0.881868 | 0.00285744 | 0.997443 | 0.00418974 |
| Wine-UCI | RF | Model-specific global importance | 0.898901 | 0.000955199 | 0.998011 | 0.00161957 |

**Supplementary Table S3 | Sensitivity under perturbation: E deviation and rESS (including Top-10 rESS) across datasets/models.**

| **Dataset** | **Model** | **XAI_Method** | **Delta_Prediction_mean** | **Delta_Prediction_std** | **E_mean** | **E_std** | **rESS_mean** | **rESS_std** | **rESS_top10_mean** | **rESS_top10_std** |
| --- | --- | --- | --- | --- | --- | --- | --- | --- | --- | --- |
| BreastCancer-UCI | LR | Model-specific global importance | 0.0133257 | 0.00350339 | 0.463183 | 0.0482775 | 0.684056 | 0.0232889 | 0.756983 | 0.0721014 |
| BreastCancer-UCI | RF | Model-specific global importance | 0.0307836 | 0.00470667 | 0.203738 | 0.0471956 | 0.831795 | 0.033485 | 0.849824 | 0.0464754 |
| Syn-Base | LR | Model-specific global importance | 0.0383989 | 0.00395713 | 0.206251 | 0.0198762 | 0.829197 | 0.0137615 | 0.836656 | 0.0129953 |
| Syn-Base | RF | Model-specific global importance | 0.0584 | 0.00296289 | 0.0775191 | 0.00451834 | 0.928071 | 0.0038938 | 0.936491 | 0.00670353 |
| Syn-SpuriousShift-Easy | LR | Model-specific global importance | 0.196089 | 0.00624162 | 0.372792 | 0.0140512 | 0.728503 | 0.00743664 | 0.735368 | 0.00814322 |
| Syn-SpuriousShift-Easy | RF | Model-specific global importance | 0.203764 | 0.00902878 | 0.689497 | 0.0450515 | 0.592237 | 0.0161944 | 0.588694 | 0.0162253 |
| Wine-UCI | LR | Model-specific global importance | 0.0120861 | 0.00343204 | 0.198042 | 0.0362375 | 0.835291 | 0.0246284 | 0.861216 | 0.0181035 |
| Wine-UCI | RF | Model-specific global importance | 0.0342222 | 0.00539366 | 0.162331 | 0.0402294 | 0.861169 | 0.0299522 | 0.874092 | 0.0376106 |

**Supplementary Table S4 | Consistency metrics across models and datasets.**

| **Dataset** | **XAI_Method** | **Model_Pair** | **Jaccard_at_k** | **Consensus_Score** |
| --- | --- | --- | --- | --- |
| BreastCancer-UCI | Top-k overlap (k=5) | LR-RF | 0.166667 | 0.166667 |
| Syn-Base | Top-k overlap (k=5) | LR-RF | 1 | 1 |
| Syn-SpuriousShift-Easy | Top-k overlap (k=5) | LR-RF | 1 | 1 |
| Wine-UCI | Top-k overlap (k=5) | LR-RF | 0.571429 | 0.571429 |

**Supplementary Table S5 | Non-triviality check for synthetic agreement (harder variant of Syn-SpuriousShift-Easy).**

| **Setting** | **Models** | **Jaccard@5 (mean±std)** | **AUC_LR (mean)** | **AUC_RF (mean)** | **Runs (T)** |
| --- | --- | --- | --- | --- | --- |
| Harder spurious-shift (mild cancellation; base signal still shared) | LR vs RF | 0.571 ± 0.130 | 0.790 | 0.806 | 5 |
| Harder spurious-shift (strong cancellation; interaction-dominant) | LR vs RF | 0.266 ± 0.159 | 0.540 | 0.628 | 5 |

**Supplementary Table S6 | Split-B numeric sanity check (Wine-UCI auditing).**

| **Setting** | **Split** | **Baseline audit error (%)** | **Gated audit error (%)** | **Coverage (%)** |
| --- | --- | --- | --- | --- |
| Audit sanity check (Split-B) | Alternative fixed stratified split | 45.0% | 0.0% | 17.5% |

**Supplementary Table S7 | Split-C numeric sanity check (Wine-UCI auditing).**

| **Baseline audit error (%)** | **Gated audit error (%)** | **Coverage (%)** | **n_kept** |
| --- | --- | --- | --- |
| 35.0 [22.1, 50.5] | 6.7 [1.2, 29.8] | 37.5 | 15 |
